# Supplementary material
Source: Springer Nature journal article supplement (https://www.springermedizin.de/resource/supplementary/12998_2005_12_MOESM1_ESM.pdf/9623364)
Supplement: MOESM1 [file 9623364]

Level pelvis

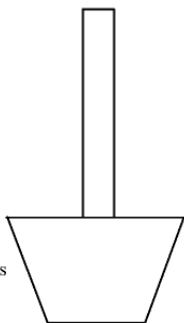

Increased lateral flexion

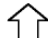

Lift

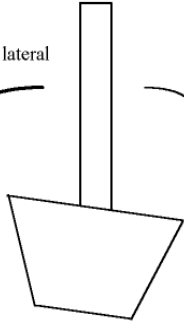

Unlevel pelvis

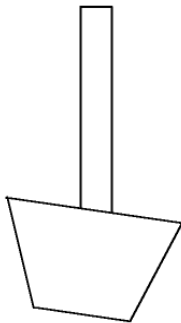

Increased lateral flexion

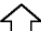

Lift

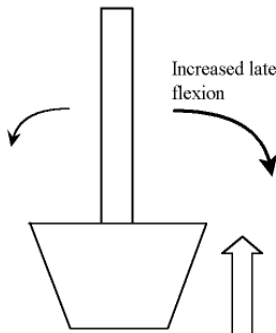

In the subjects with pre-existing pelvic unleveling, placing a lift under the low side and leveling the pelvis had the same result vis-a-vie lateral flexion as creating pelvic unleveling in subjects with a level pelvis: increased lateral flexion to the - now - high or elevated side. This is evidence that the joints, ligaments, and muscles of the lumbar spine and pelvis have permanently adapted to any anatomic leg-length inequality.
